# Supplementary material
Source: publisher site journal article supplement (https://www.dovepress.com/article/512760)
Supplement: Supplementary file 1 [file 512760%20Supplemental%20Figures_1.docx]

**Late Breast Cancer Recurrence Prediction: The Role of CTS5 and Progesterone Receptor Status**

**SUPPLEMENTAL FIGURE LEGENDS**

Supplemental Figure 1. DFS for the total study population.

Supplemental Figure 2. DFS by PR level for the total population. PR, Progesteron receptor.

**
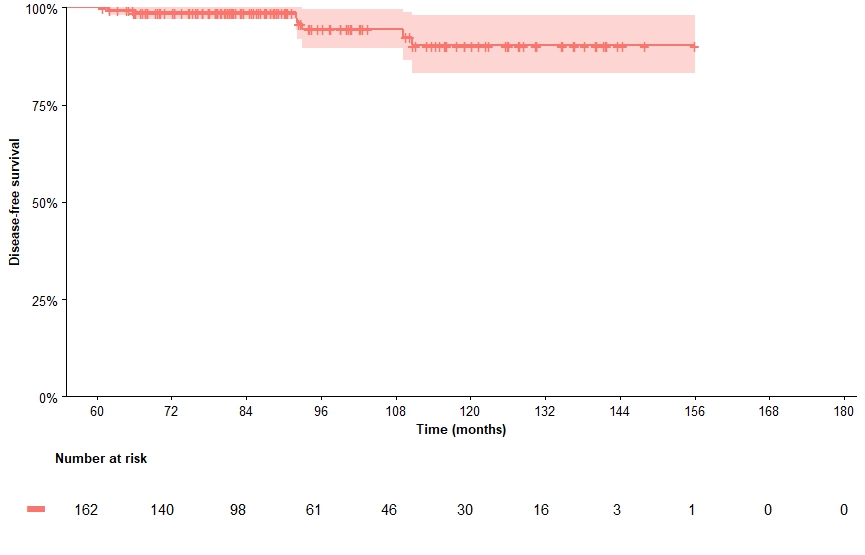
**

Supplemental Figure 1. DFS for the total study population.

**
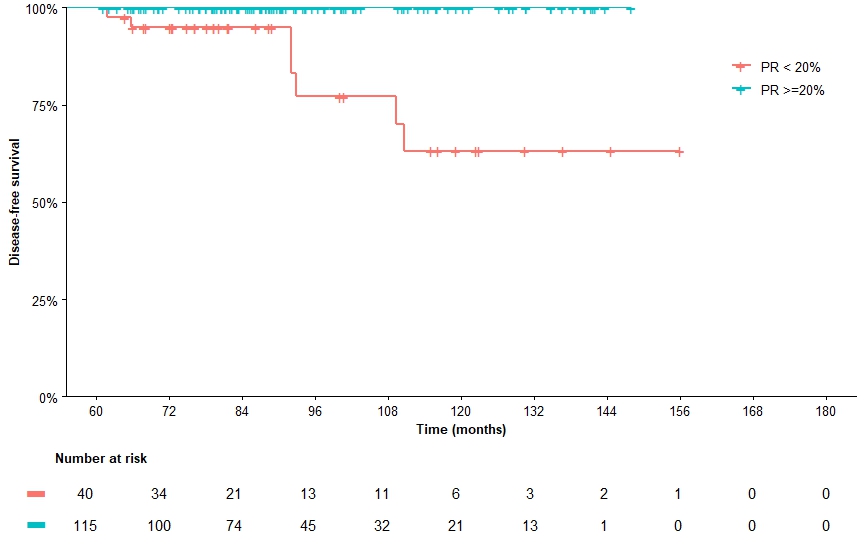
**

Supplemental Figure 2. DFS by PR level for the total population. PR, Progesteron receptor.
